# Supplementary material for: A heat-set lanthanide metallogel capable of emitting stable luminescence under thermal, mechanical and water stimuli
Source: Royal Society of Chemistry journal article supplement (doi:10.1039/c9dt04713a), 2020-01-01
Supplement: c9dt04713a1.pdf [file c9dt04713a1.pdf]

*Electronic Supplementary Information (ESI) for:*

## **A heat-set lanthanide metallogel capable of emitting stable luminescence under thermal, mechanical and water stimuli**

Binbin Zhang<sup>a</sup>, Xuelin Dong,<sup>ab</sup> Yuxing Xiong<sup>b</sup>, Qi Zhou,<sup>a</sup> Shan Lu,<sup>a</sup> Yonggui Liao,<sup>a</sup> Yajiang Yang<sup>a</sup> and Hong Wang<sup>\*a</sup>

### **Additional data**

#### **1. <sup>1</sup>H-NMR spectra of H<sub>6</sub>L**

<sup>1</sup>H-NMR spectrum of H<sub>6</sub>L in DMSO-*d*<sub>6</sub> was recorded on a Bruker Avance III spectrometer operating at 400 MHz. 13.03 (6H), 9.70 (3H), 8.46 (6H), 8.11 (3H).

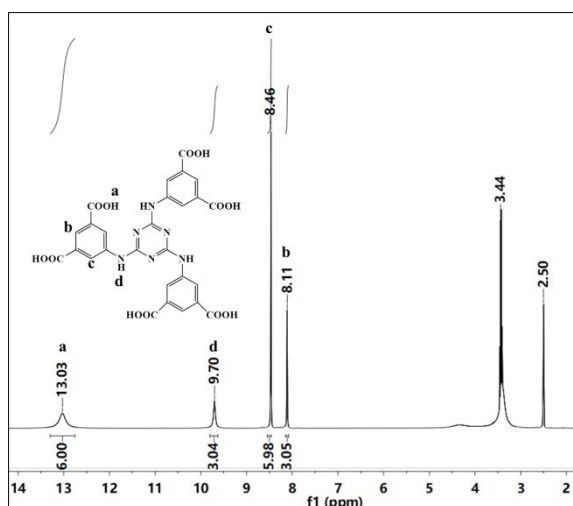

**Fig. S1** <sup>1</sup>H NMR spectra of H<sub>6</sub>L in DMSO-*d*<sub>6</sub>.

#### **2. ESI-MS spectra of H<sub>6</sub>L**

H<sub>6</sub>L was dissolved in DMF and diluted to 10<sup>-5</sup> M with acetonitrile, and its ESI mass spectrum was recorded on a Bruker UltiMate 3000-microTOFII in positive-ion mode. MS m/z: calcd. For C<sub>27</sub>H<sub>18</sub>N<sub>6</sub>O<sub>12</sub> [H<sub>6</sub>L+H]<sup>+</sup>: 619.1062; found: 619.1042.

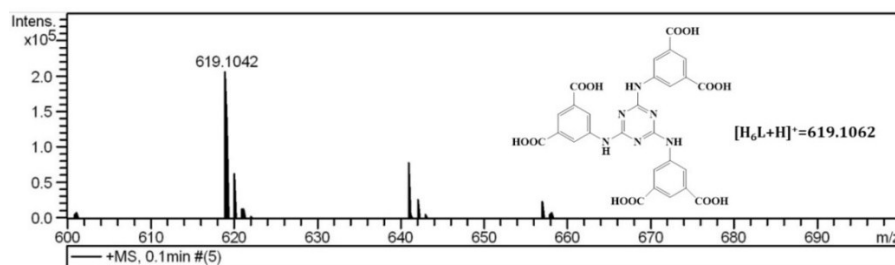

**Fig. S2** ESI-MS spectra of H<sub>6</sub>L.

### 3. Preparation of H<sub>6</sub>L/Tb gel in varied solvents

H<sub>6</sub>L (7.4 mg, 0.012 mmol) and TbCl<sub>3</sub>·6H<sub>2</sub>O (4.5 mg, 0.012 mmol) were dissolved in a predetermined volume of DMF or DMSO (mL) after which CH<sub>3</sub>OH, H<sub>2</sub>O or CH<sub>3</sub>CH<sub>2</sub>OH (predetermined volume, mL) was added with vortex blending. A total mixed solution of 1 mL was then placed in a closed vessel (5 mL) and heated for 2 h at 85°C to achieve gelation.

**Tab. S1** Gelation tests of H<sub>6</sub>L and Tb<sup>3+</sup> in different mixed solvents

| Solvents \ Results                      | V/V |     |     |     |     |     |     |     |     |  |
|-----------------------------------------|-----|-----|-----|-----|-----|-----|-----|-----|-----|--|
|                                         | 9:1 | 8:2 | 7:3 | 6:4 | 5:5 | 4:6 | 3:7 | 2:8 | 1:9 |  |
| DMF/CH <sub>3</sub> OH                  | S   | S   | TS  | G   | G   | G   | TS  | P   | P   |  |
| DMF/H <sub>2</sub> O                    | P   | P   | G   | G   | G   | G   | G   | P   | P   |  |
| DMSO/H <sub>2</sub> O                   | S   | S   | S   | S   | G   | G   | G   | G   | G   |  |
| DMF/CH <sub>3</sub> CH <sub>2</sub> OH  | S   | S   | S   | S   | S   | S   | S   | TS  | TS  |  |
| DMSO/CH <sub>3</sub> OH                 | S   | S   | S   | S   | S   | S   | S   | TS  | TS  |  |
| DMSO/CH <sub>3</sub> CH <sub>2</sub> OH | S   | S   | S   | S   | S   | S   | TS  | TS  | P   |  |

S = solution; G = gel; TS = turbid solution; P = precipitation.

### 4. Preparation of H<sub>6</sub>L/Tb gel with different H<sub>6</sub>L or Tb<sup>3+</sup> concentration

H<sub>6</sub>L (predetermined weight, mg) and TbCl<sub>3</sub>·6H<sub>2</sub>O (4.5 mg, 0.012 mmol) were dissolved in DMF (0.5 mL) after which CH<sub>3</sub>OH (0.5 mL) was added with vortex blending. The solution was then placed in a closed vessel (5 mL) and heated for 2 h at 85°C to achieve gelation.

**Tab. S2** Gelation tests of H<sub>6</sub>L at a constant Tb<sup>3+</sup> concentration

|                       |     |     |     |      |       |      |
|-----------------------|-----|-----|-----|------|-------|------|
| H <sub>6</sub> L (mg) | 0.0 | 3.7 | 7.4 | 11.1 | 14: 8 | 18.5 |
| Results               | S   | P   | G   | G    | G     | TS   |

S = solution; G = gel; TS = turbid solution; P = precipitation.

H<sub>6</sub>L (7.4 mg, 0.012 mmol, the minimum gelation weight of H<sub>6</sub>L) and TbCl<sub>3</sub>·6H<sub>2</sub>O (predetermined molar weight) were dissolved in DMF (0.5 mL) after which CH<sub>3</sub>OH (0.5 mL) was added with vortex blending. The solution was then placed in a closed vessel (5 mL) and heated for 2 h at 85°C to achieve gelation.

**Tab. S3** Gelation tests with different H<sub>6</sub>L/Tb<sup>3+</sup> molar ratio

|                                    |          |          |         |          |          |          |
|------------------------------------|----------|----------|---------|----------|----------|----------|
| H <sub>6</sub> L: Tb <sup>3+</sup> | 1.0: 0.0 | 1.0: 0.5 | 1.0:1.0 | 1.0: 1.5 | 1.0: 2.0 | 1.0: 2.5 |
| Results                            | P        | P        | G       | G        | G        | TS       |

P = precipitation; G = gel; TS = turbid solution.

### 5. FT-IR spectra of H<sub>6</sub>L and H<sub>6</sub>L/Tb<sup>3+</sup> powder

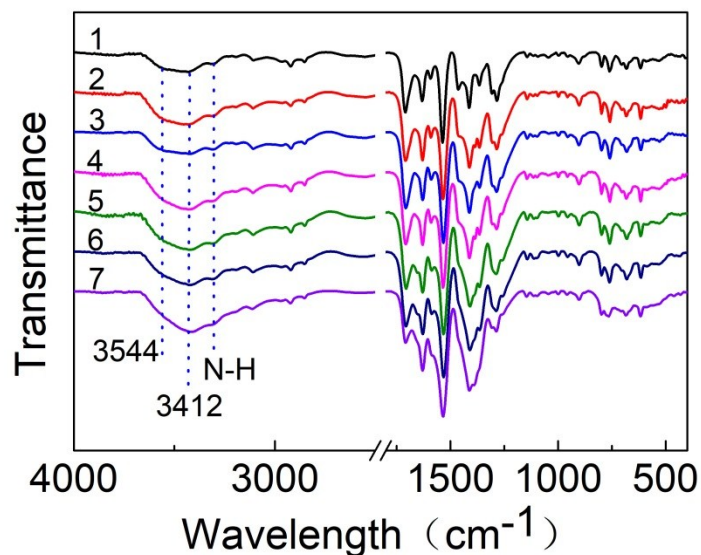

**Fig. S3** FT-IR spectra of H<sub>6</sub>L (1) and H<sub>6</sub>L/Tb<sup>3+</sup> powder prepared from H<sub>6</sub>L/Tb<sup>3+</sup> solutions heated for various times: 0 min (2), 10 min (3), 30 min (4), 60 min (5), 90 min (6), and 120 min (7) at 85°C.

### 6. Schematic illustration of self-assembly of H<sub>6</sub>L/Tb complex.

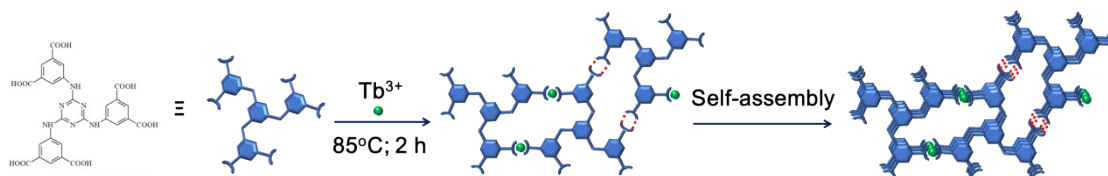

**Fig. S4** Schematic illustration of self-assembly of  $H_6L/Tb$  complex.

### 7. The effect of solvents and $H_6L/Tb^{3+}$ ratios on the luminescent intensity of $H_6L/Tb$ gel

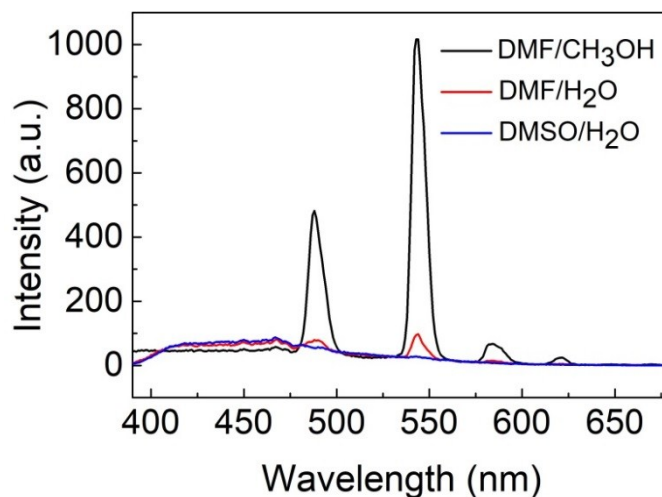

**Fig. S5** Effect of solvents on luminescent intensity of  $H_6L/Tb$  gel ( $\lambda_{ex}=333$  nm) formation in 1/1 (v/v) solvent/solvent.

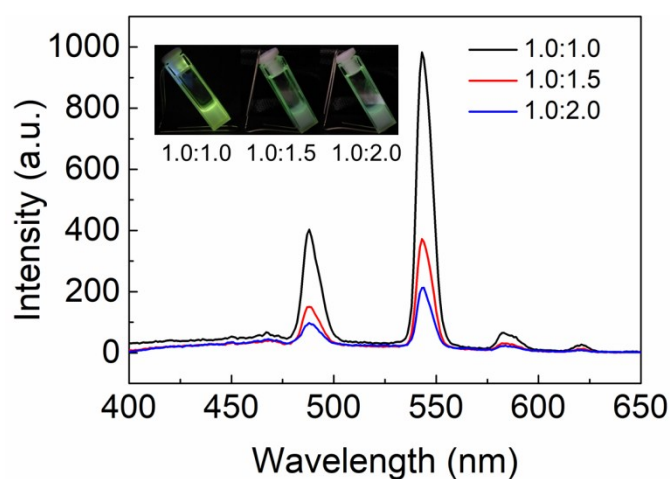

**Fig. S6** The effect of the  $H_6L/Tb^{3+}$  ratios on luminescent intensity of  $H_6L/Tb$  gel ( $H_6L = 7.4$  mg,  $\lambda_{ex}=333$  nm) formation in 1/1 (v/v) DMF/ $CH_3OH$ .

### 8. Thermal stability of $H_6L/Tb$ gel

The H<sub>6</sub>L/Tb gel was placed in the thermostat (DHG-9035AE) and maintained at 1 h for each temperature, and the gel was found stable in 0 and 100 °C.

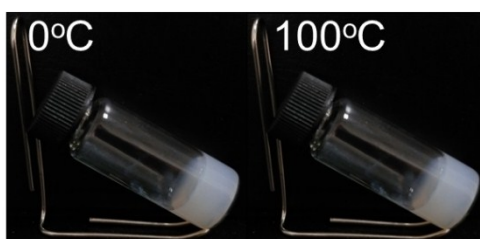

**Fig. S7** Photographs of H<sub>6</sub>L/Tb gel appearance in 0 and 100 °C.

### 9. Stable luminescence of collapsed H<sub>6</sub>L/Tb gels by manual shaking treated by varied sonication time.

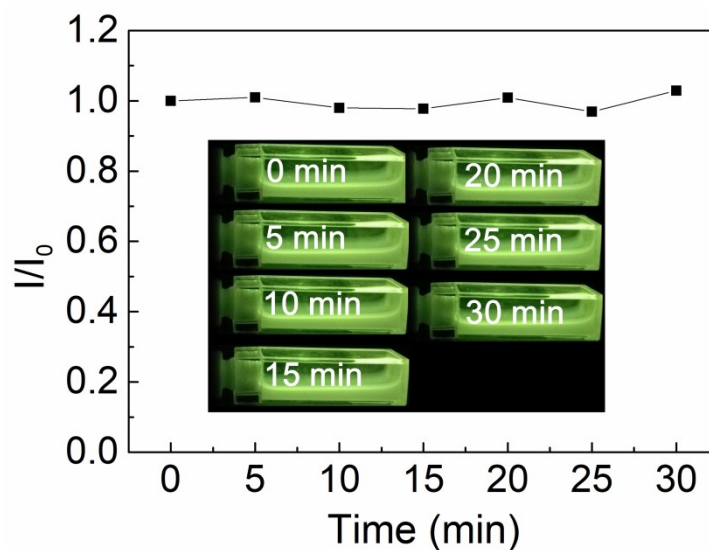

**Fig. S8** Luminescence stability performance of collapsed H<sub>6</sub>L/Tb gels by manual shaking treated by varied sonication time, where the ratio of  $I/I_0$  is the luminescence intensities of the collapsed H<sub>6</sub>L/Tb gel before and after sonication.

### 10. Luminescence decay curves

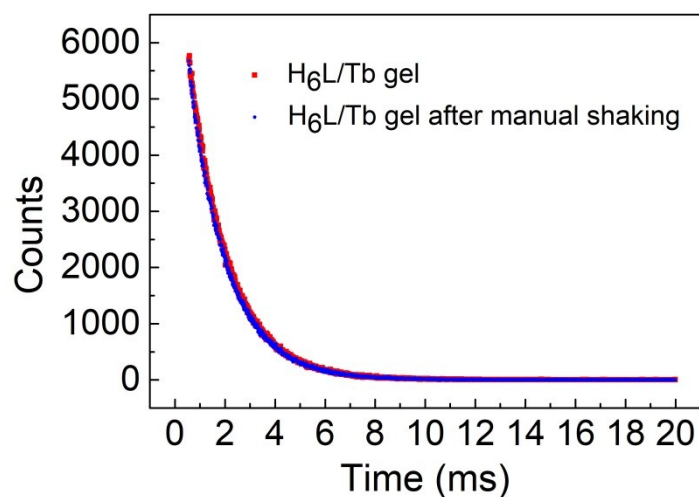

**Fig. S9** Luminescence decay curves of  $^5D_4 \rightarrow ^7F_5$  (544 nm) from H<sub>6</sub>L/Tb gel (red) and H<sub>6</sub>L/Tb gel after manual shaking (blue).

#### 11. FT-IR spectra of H<sub>6</sub>L/Tb xerogel and the powder of H<sub>6</sub>L/Tb gel after manual shaking

The powder of H<sub>6</sub>L/Tb gel after shaking was prepared by centrifugally separating the H<sub>6</sub>L/Tb gel after manual shaking and then drying at 40°C under vacuum for 24 hours.

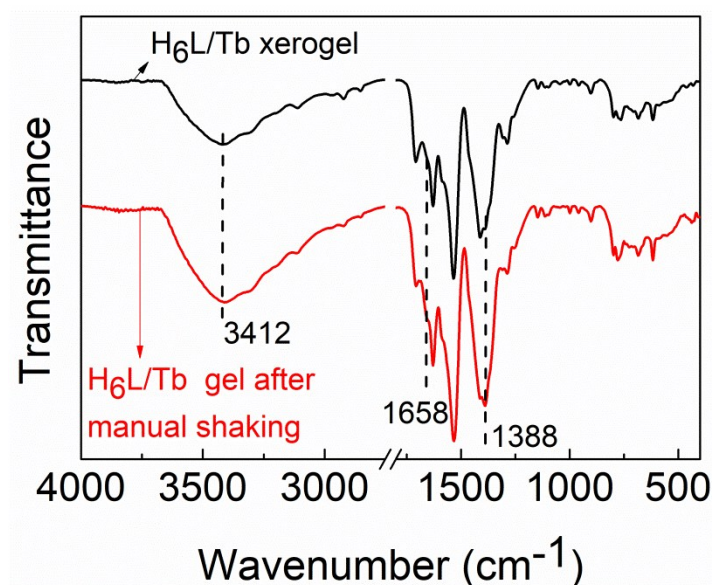

**Fig. S10** FT-IR spectra of H<sub>6</sub>L/Tb xerogel and the powder of H<sub>6</sub>L/Tb gel after manual shaking.

#### 12. XRD pattern of powder of H<sub>6</sub>L/Tb gel after manual shaking

The powder of H<sub>6</sub>L/Tb gel after shaking was prepared by centrifugally separating the H<sub>6</sub>L/Tb gel after manual shaking and then drying at 40°C under vacuum for 24 hours.

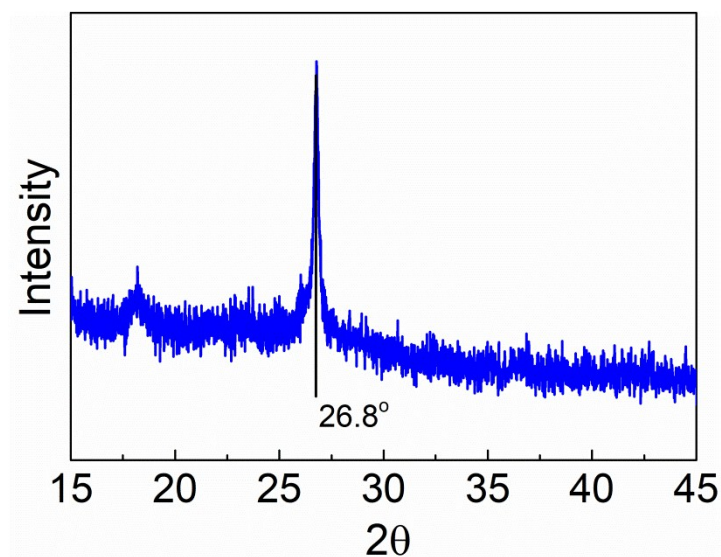

**Fig. S11** XRD pattern of H<sub>6</sub>L/Tb gel after manual shaking.

### 13. FT-IR spectra of H<sub>6</sub>L/Tb xerogel and the powder of H<sub>6</sub>L/Tb xerogel after soaking in water

The solid powder of H<sub>6</sub>L/Tb xerogel after soaking in water was prepared by centrifugally separating the H<sub>6</sub>L/Tb xerogel after soaking in water of 18 h and then drying at 40°C under vacuum for 24 hours.

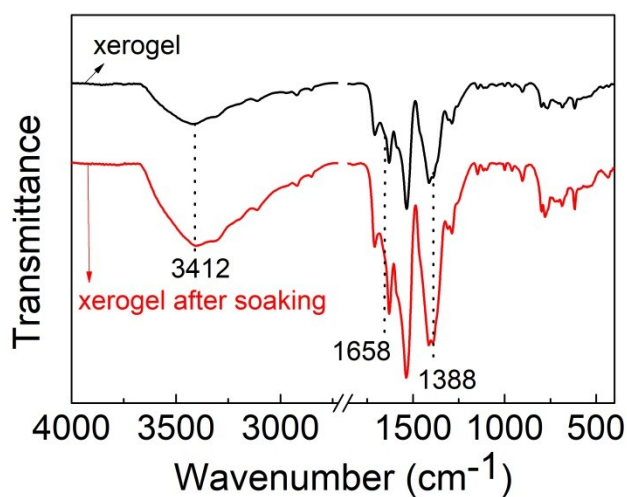

**Fig. S12** FT-IR spectra of H<sub>6</sub>L/Tb xerogel and H<sub>6</sub>L/Tb xerogel upon the treatment of soaking in water.

### 14. XRD pattern of solid power of H<sub>6</sub>L/Tb xerogel after soaking in water

The solid power of H<sub>6</sub>L/Tb xerogel after soaking in water was prepared by centrifugally separating the H<sub>6</sub>L/Tb xerogel after soaking in water of 18 h and then by drying at 40°C under vacuum for 24

hours.

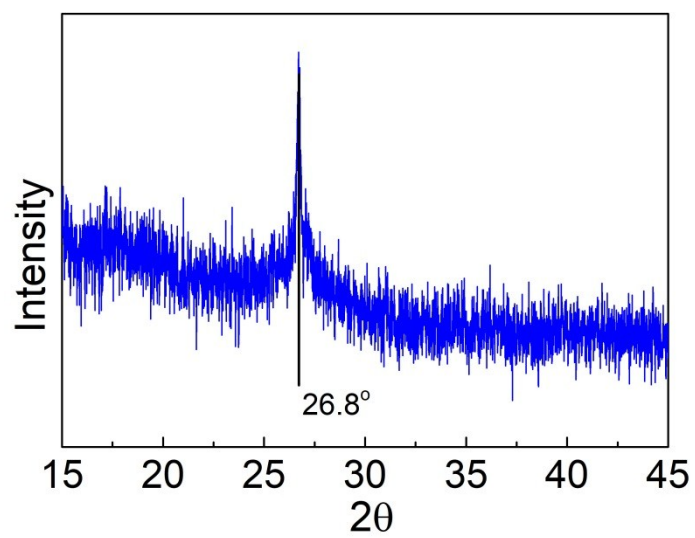

**Fig. S13** XRD pattern of H<sub>6</sub>L/Tb xerogel after soaking in water.
